# Supplementary material for: Temperature Responsive Polymer Conjugate Prepared by “Grafting from” Proteins toward the Adsorption and Removal of Uremic Toxin
Source: MDPI journal article supplement (doi:10.3390/molecules27031051), 2022-02-03
Supplement: s1 [file s1]

## Supporting information

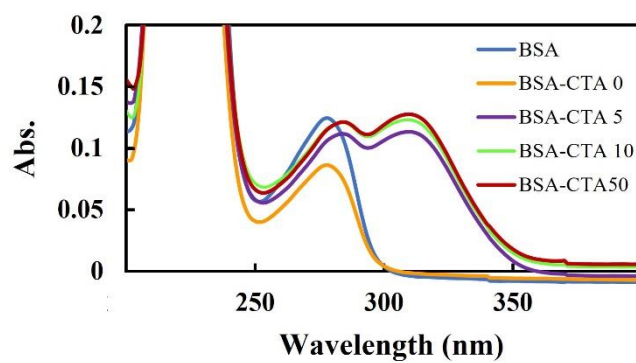

**Figure S1.** UV-vis measurement results of each BSA-CTA in water (1 mg/mL).

**Table S1.** Feeding ratio of BSA-PNIPAAm for the investigation of monomer concentration

| <b>Sample name</b> | <b>BSA<br/>[μmol]</b> | <b>NIPAAm<br/>[μmol]</b> | <b>VA-044<br/>[μmol]</b> | <b>CTA<br/>[μmol]</b> | <b>C<br/>[mM]</b> |
|--------------------|-----------------------|--------------------------|--------------------------|-----------------------|-------------------|
| BSA-CTA5-PNIPAm A  | 1                     | 400                      | 50                       | 5                     | 800               |
| BSA-CTA5-PNIPAm B  | 1                     | 400                      | 50                       | 5                     | 400               |

RAFT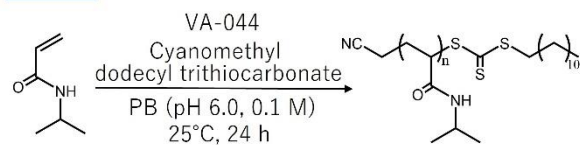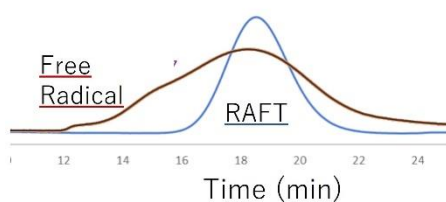

- Free Radical : Mn=153,000 | Mw/Mn=2.9
- RAFT : Mn=135,000 Mw/Mn=1.2

**Figure S2.** The GPC results of PNIPAAm with and without CTA.

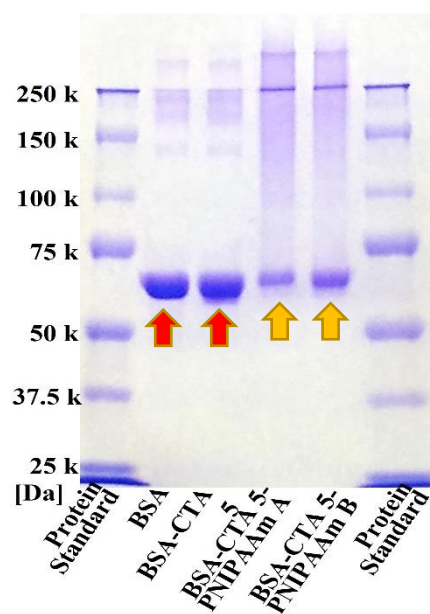

**Figure S3.** Monomer concentration of BSA-PNIPAAm conjugates observed through SDS-PAGE. (Red arrows, no band broadening while yellow arrows show band broadening after conjugation).

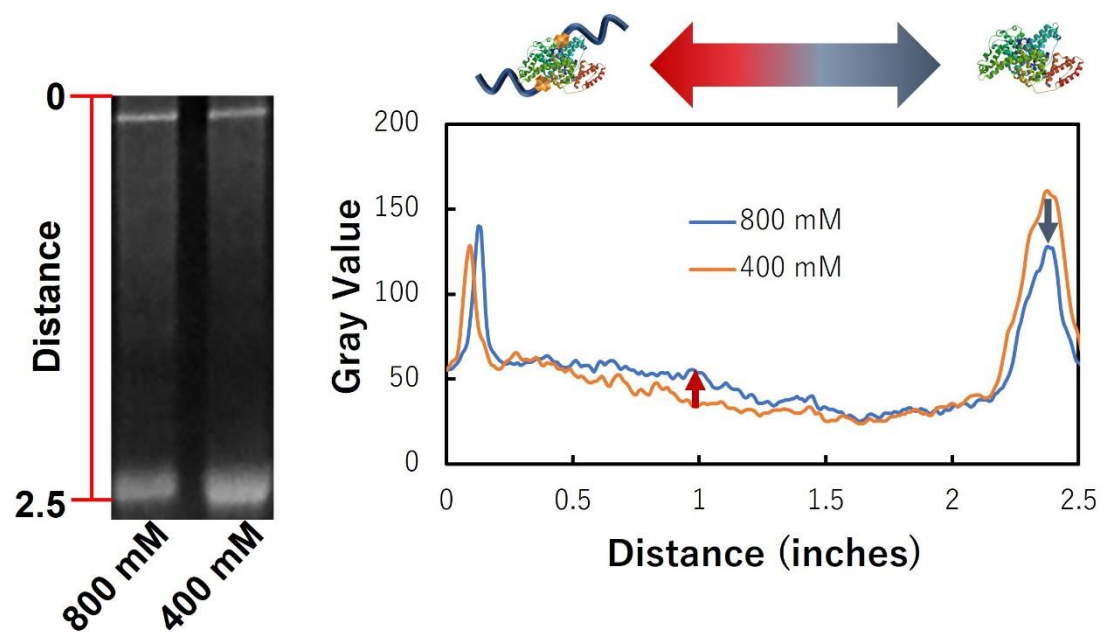

**Figure S4.** Gray value of the SDS-PAGE result calculated by image J. (The band on the high molecular weight side with 800 mM was more deep color).

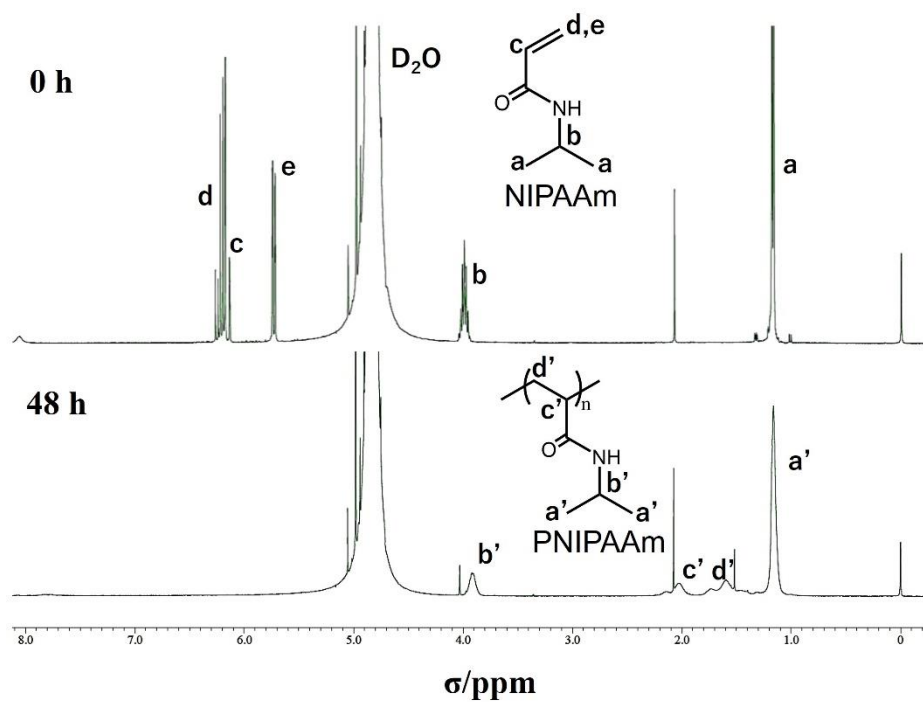

**Figure S5.**  $^1\text{H}$  NMR spectrum of BSA-PNIPAAm in  $\text{D}_2\text{O}$ .

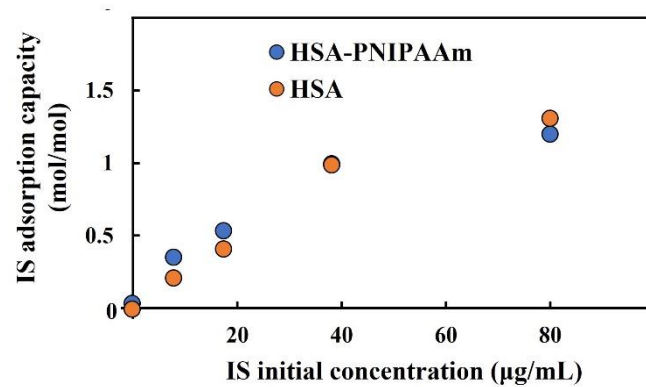

**Figure S6.** Adsorption isotherm of each sample.
